# Supplementary material for: Exploring the Chemical Space of Urease Inhibitors to Extract Meaningful Trends and Drivers of Activity
Source: PubMed Central journal article supplement (PMC9775197; doi:10.1021/acs.jcim.2c00150), 2022-06-06
Supplement: ci2c00150_si_001.pdf [file ci2c00150_si_001.pdf]

## SUPPORTING INFORMATION

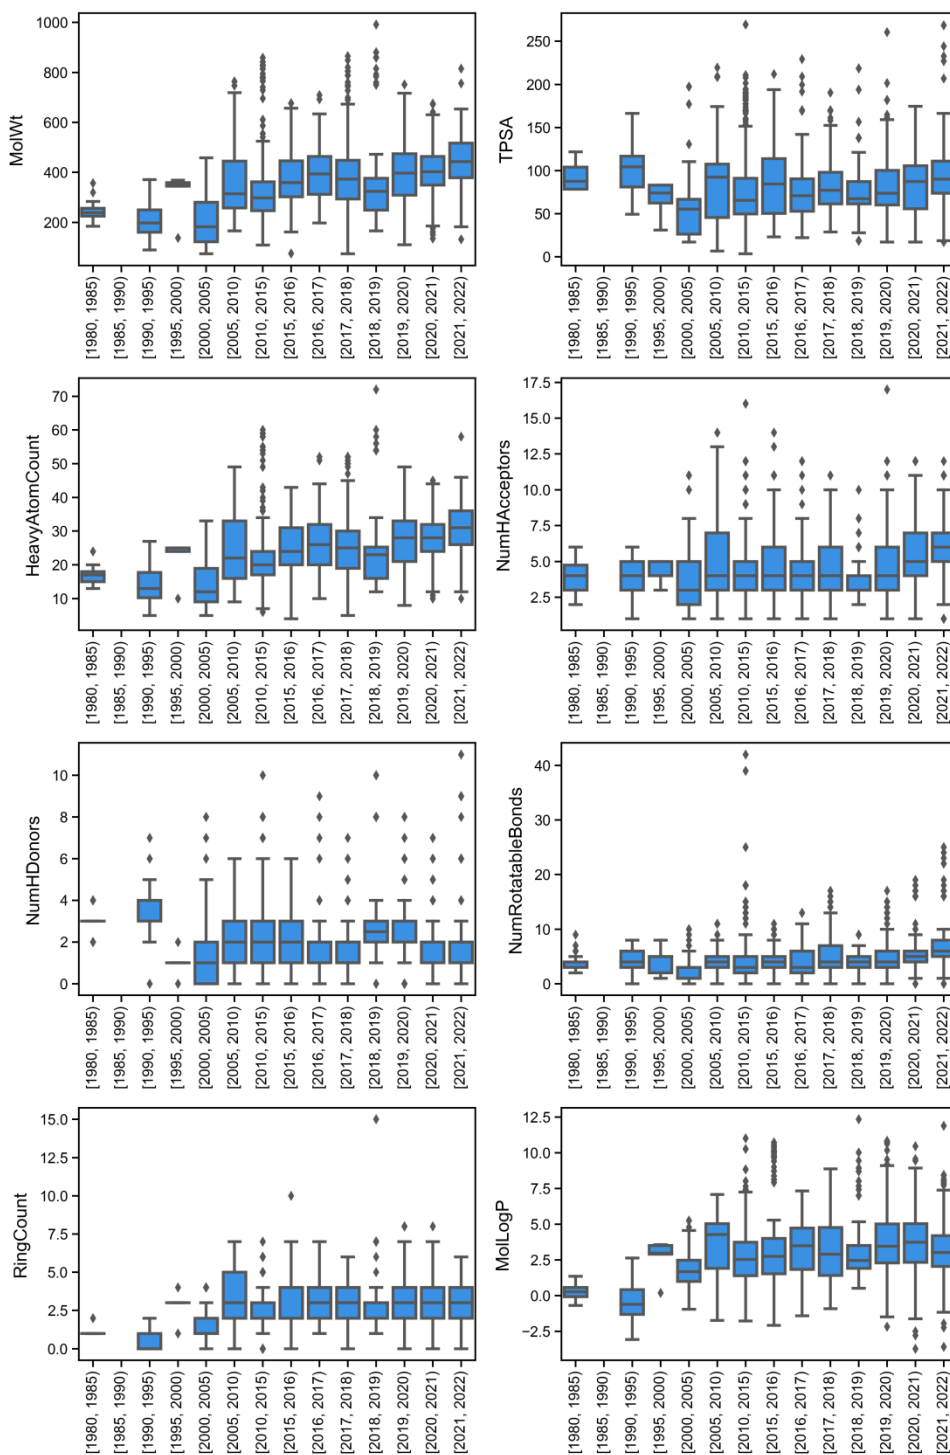

2

3

**Figure S1.** Trends of the overall chemical properties of urease inhibitors in a historical perspective.

4

5

6

7

8

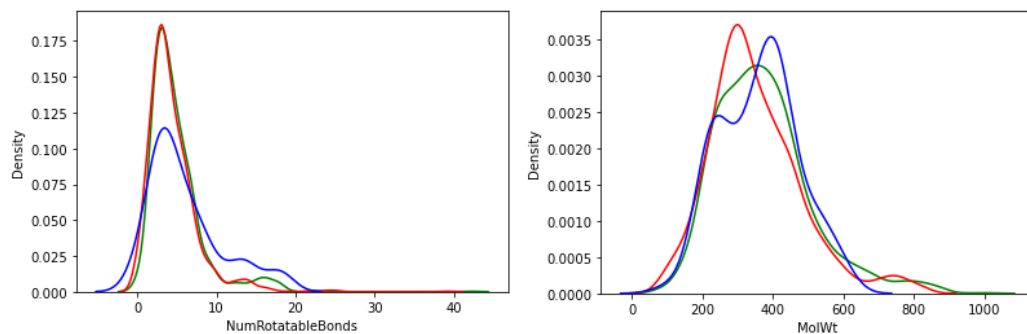

9

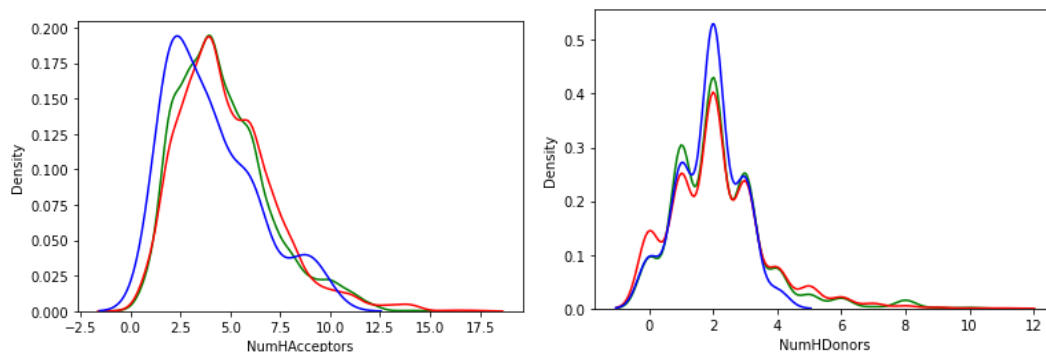

10

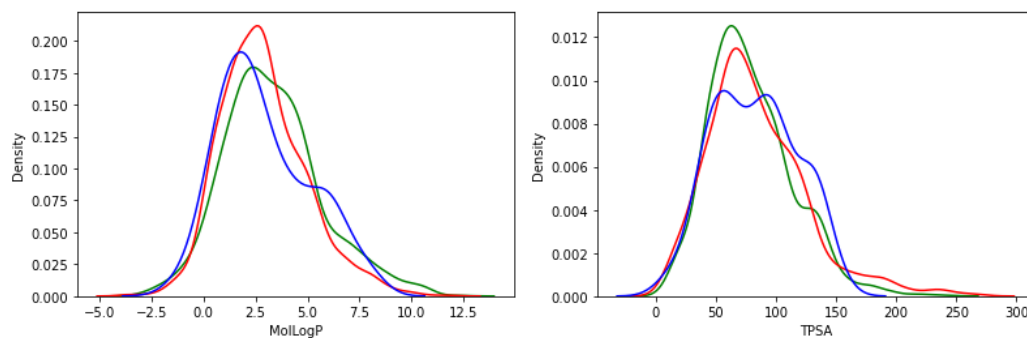

11 **Figure S2.** Distribution of different properties for active (green) and inactive (red) compounds and  
12 comparison to the top 100 most active compounds (blue).

13

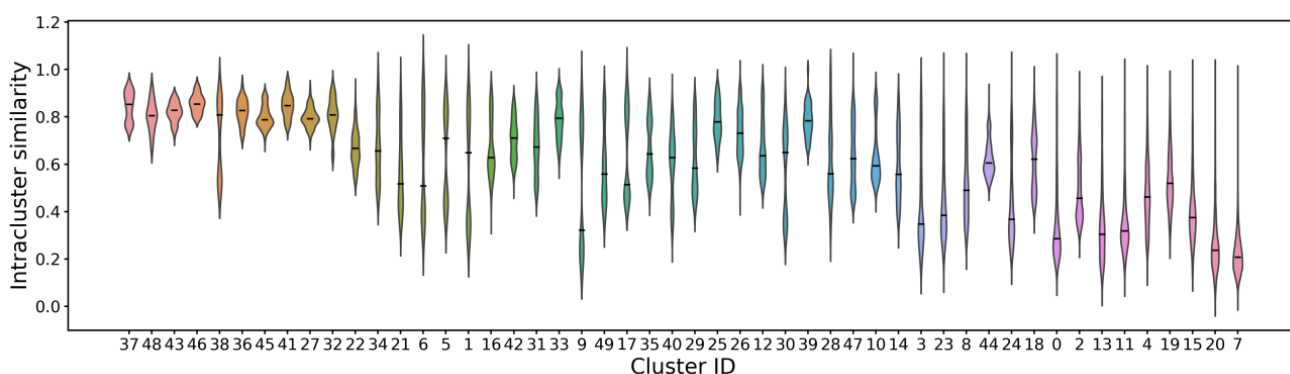

14

15 **Figure S3.** Intracluster similarity distribution of the 50 clusters obtained from the full dataset, with  
16 clusters sorted by ascending number of compounds per cluster. The black horizontal line across each  
17 distribution indicates the median intracluster similarity. The cluster with the lowest number of  
18 compounds (cluster 37) still had at least 10 compounds. The intracluster similarity distribution was  
19 obtained from calculating all-versus-all compound similarities in a given cluster.

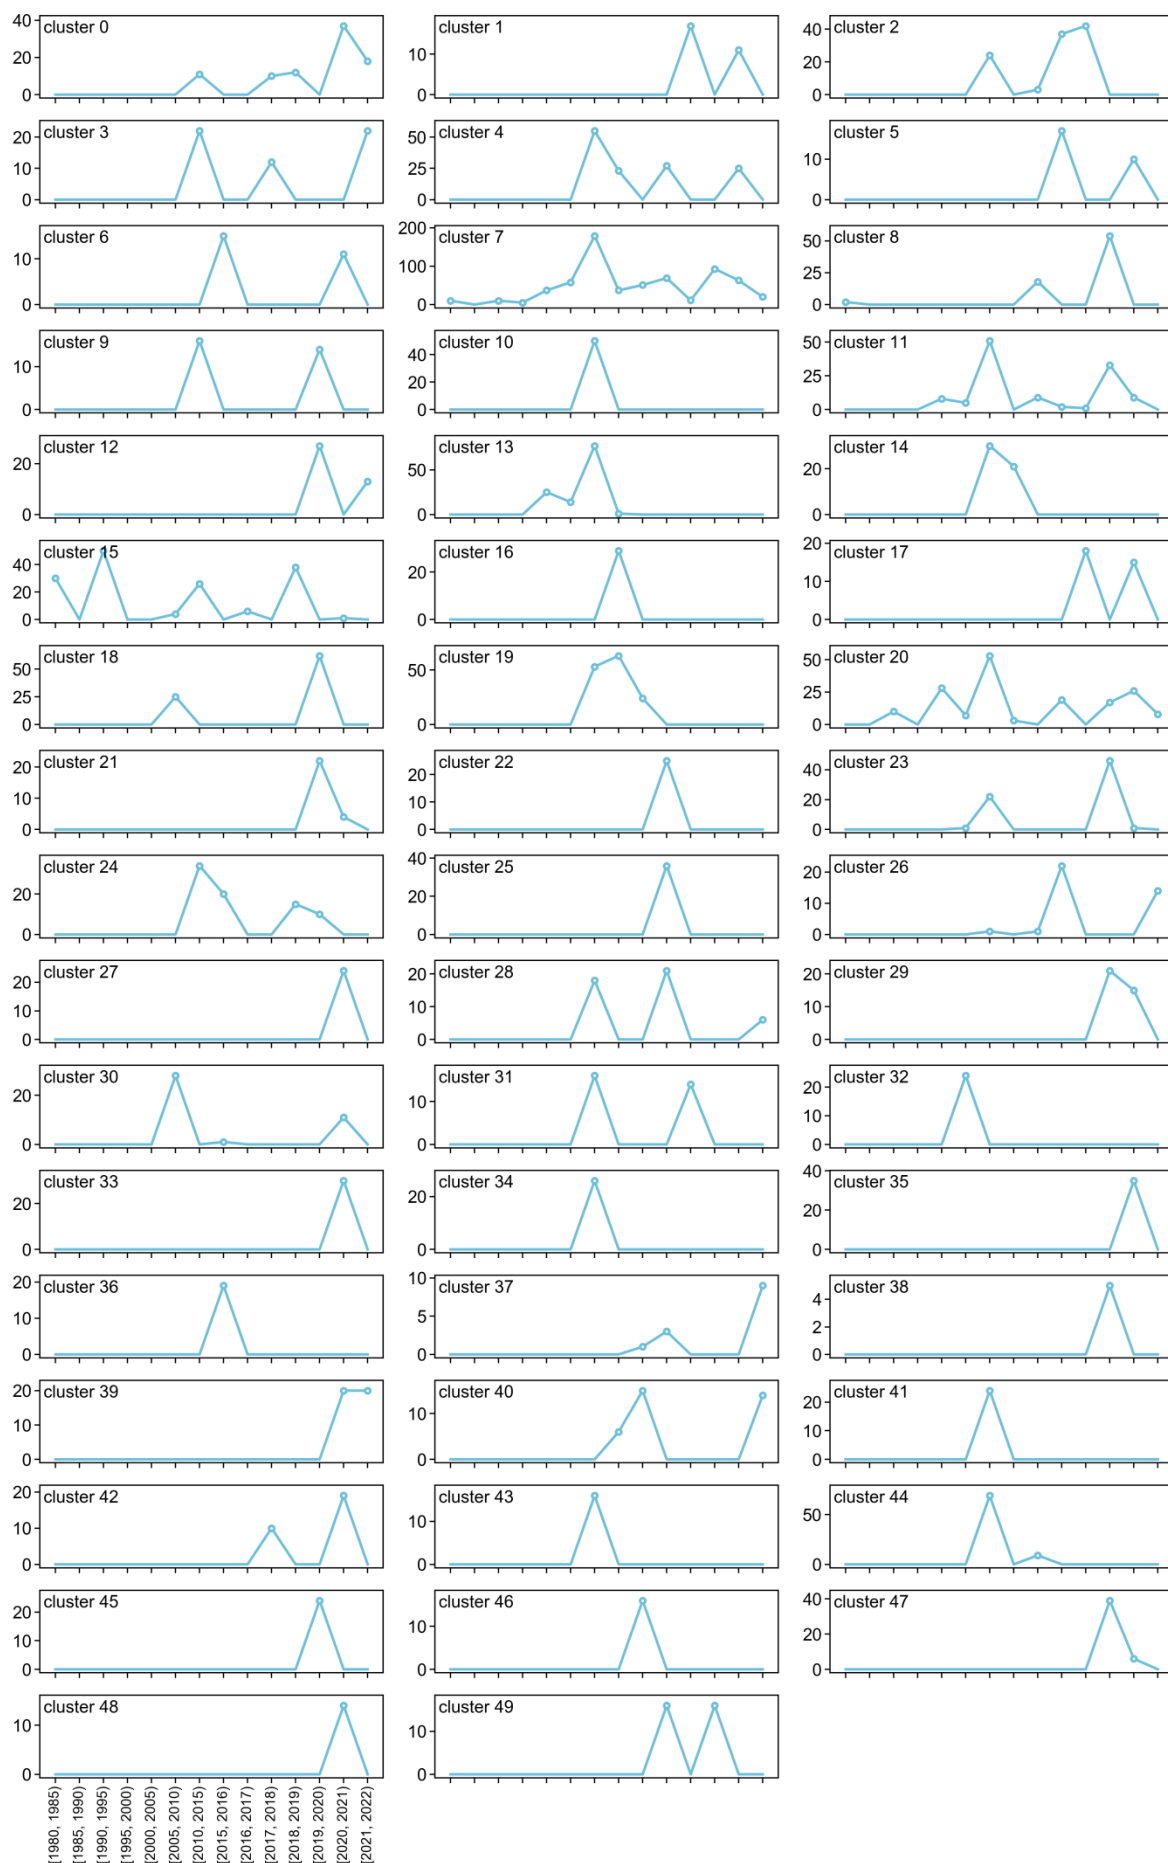

20  
21  
22

**Figure S4.** Temporal trends of compound development within each cluster where the Y-axis measures number of compounds and the X-axis measures time in years, and the X ticks correspond to the intervals shown in cluster 48's plot.

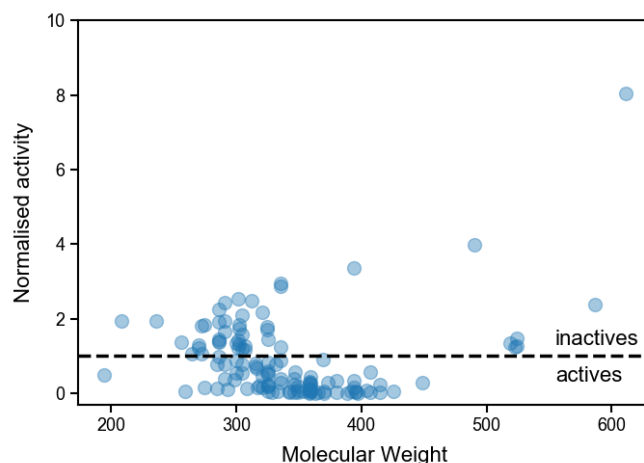

24

25 **Figure S5.** Normalised activity as a function of molecular weight for cluster 19. It is apparent that  
 26 there is an interval of MW ideal for inhibitory activity. The Y axis was capped at a maximum of 10 to  
 27 enable visualisation of the trend near the activity cut-off (normalised activity = 1). We hypothesize  
 28 that too big or too small molecules do not properly fit into urease's catalytic pocket and thus do not  
 29 effectively reduce the mobility of the flap helix.

30

31 **Table S1.** Scaffolds from clustering. MCS = Maximum common substructure (i.e. common  
 32 scaffold); ICS min = minimum intracluster similarity; ICS med= median intracluster similarity.

| Cluster ID | MCS pattern SMARTS                                                                                                                                        | N comp. | % actives | ICS min. | ICS med. |
|------------|-----------------------------------------------------------------------------------------------------------------------------------------------------------|---------|-----------|----------|----------|
| 0          | c1ccccc1                                                                                                                                                  | 88      | 95.5      | 0.11     | 0.28     |
| 1          | O=[#6]-[#7]-c1ccccc1                                                                                                                                      | 28      | 42.9      | 0.26     | 0.64     |
| 2          | [#6]\[#6]=[#6]/[#6]-[#6]-1[N,C][#6](=[S,O])-[#7]-[#6]=[#6]-1-[#6]=O                                                                                       | 106     | 55.7      | 0.25     | 0.45     |
| 3          | [#6]-c1ccccc1                                                                                                                                             | 56      | 48.2      | 0.14     | 0.34     |
| 4          | [#6]=[#6]-1-[#6](=O)-[#7]-[#6](=[O,S])-[#7]-[#6]-1=O                                                                                                      | 130     | 34.6      | 0.13     | 0.46     |
| 5          | [#6]=[#6]-c1cc2ccccc2oc1=O                                                                                                                                | 27      | 85.2      | 0.34     | 0.70     |
| 6          | [#6]-1-[#6]-[#6](-[#6]-2=[#7]-[#6](-[#6](-[#7]-2)-c2ccccc2)-c2ccccc2)=[#6](-[#7]-1)-c1ccccc1                                                              | 26      | 65.4      | 0.27     | 0.50     |
| 7          | --                                                                                                                                                        | 674     | 49.4      | 0.0      | 0.20     |
| 8          | O=[#6](-[#7]-[#7]-[#6]=[O,S])-[#6]-1=[#6]-[#6]=[N,C][#6]=[#6]-1                                                                                           | 74      | 67.6      | 0.22     | 0.48     |
| 9          | [#6]-[#7]-1-[#6]=[#7]-[#6](=O)\[#6](=[#6]\[#7])-[#6]-1=O                                                                                                  | 30      | 50.0      | 0.19     | 0.32     |
| 10         | [#6]-[#7](-[#8])-[#6](=O)-[#6]C1([#8])[#6]=[#6](-[#8]-c2ccccc12)-c1ccccc1                                                                                 | 50      | 20.0      | 0.45     | 0.59     |
| 11         | [#6]-c1ccccc1                                                                                                                                             | 118     | 21.2      | 0.08     | 0.31     |
| 12         | [#6]-n1c(-[#6]-c2ccccc2)nc2ccccc2c1=O                                                                                                                     | 40      | 100       | 0.48     | 0.63     |
| 13         | [N,S]1[#6]=[N,S][N,S]=[#6]1                                                                                                                               | 117     | 27.4      | 0.05     | 0.30     |
| 14         | [#6]-c1nccn1-[#6]-[#6]-[#8]                                                                                                                               | 51      | 15.7      | 0.31     | 0.55     |
| 15         | [#8]-[#7]-[#6]=O                                                                                                                                          | 155     | 71.0      | 0.10     | 0.37     |
| 16         | [#6]C1([#6])[#6]-[#6](-[#8])=[#6](-[#6](-[#6]-[#6]=O)-c2ccccc2)-[#6](=O)-[#6]1                                                                            | 29      | 0.0       | 0.38     | 0.62     |
| 17         | [#6]-[#6]-1=[#6]-[#6]=[#6](-[#6]=[#6]-1)-[#6](-[#6]-1=[#6]-[#7]-[#6]-2=[#6]-[#6]=[#6]-[#6]=[#6]-1-2)-[#6]-1=[#6]-[#7]-[#6]-2=[#6]-1-[#6]=[#6]-[#6]=[#6]-2 | 33      | 57.6      | 0.42     | 0.51     |
| 18         | [#8]-c1c(-[#6]-c2c(-[#8])c3ccccc3oc2=O)c(=O)oc2ccccc12                                                                                                    | 87      | 19.5      | 0.35     | 0.62     |
| 19         | c1ccccc1; O=[#6]-[#7]-[#6](=[S])-[#7]-c1ccccc1                                                                                                            | 140     | 56.4      | 0.24     | 0.51     |
| 20         | --                                                                                                                                                        | 175     | 34.9      | 0.0      | 0.23     |
| 21         | [#7]=c1nc(cs1)-c1ccccc1                                                                                                                                   | 26      | 73.1      | 0.31     | 0.51     |
| 22         | [#6]-c1ccc2nc(nc2c1)-c1ccccc1                                                                                                                             | 25      | 20        | 0.51     | 0.66     |
| 23         | [#8]-c1ccccc1-[#8]                                                                                                                                        | 70      | 11.4      | 0.12     | 0.38     |
| 24         | [#7]-[#6]-1=[#6]-[#6]=[#6]-[#6]=[#6]-1                                                                                                                    | 79      | 68.4      | 0.16     | 0.36     |

|    |                                                                                                                                                                                                                 |    |                     |      |      |
|----|-----------------------------------------------------------------------------------------------------------------------------------------------------------------------------------------------------------------|----|---------------------|------|------|
| 25 | [#6]-[#6](-[#7])-[#6](=O)-[#7]-1-[#6]-[#6]-[#6]-[#6]-1-[#6](=O)-[#7]-1-[#6]-[#6]-[#7](-[#6]-[#6]-1)-c1cccc1                                                                                                     | 36 | 47.2                | 0.61 | 0.77 |
| 26 | [C]-c1cc2c(cc1-[#7]-1-[#6]-[#6]-[#7]-[#6]-[#6]-1)ncc(-[#6]=O)c2=O                                                                                                                                               | 38 | 59.9                | 0.43 | 0.73 |
| 27 | O=[#6](-[#6]-[#8]-c1cc(=O)oc2ccccc12)-[#7]\[#7]=[#6]c1cccc1                                                                                                                                                     | 24 | 33.3                | 0.68 | 0.79 |
| 28 | [#6]-[#6]-[#6]-[#6]-[#6]-[#6]-[#6]-[#6]-[#6]-[#6]-[#6]=O                                                                                                                                                        | 45 | 86.7                | 0.27 | 0.55 |
| 29 | [#6]\[#6](=[#7]/[#7]-[#6](-[#7])=S)-c1cccc1                                                                                                                                                                     | 36 | 88.9                | 0.39 | 0.58 |
| 30 | [#7]-c1nc(cs1)-c1cccc1                                                                                                                                                                                          | 40 | 82.5                | 0.27 | 0.64 |
| 31 | [#7]-[#6](=S)-[#7]\[#7]=[#6]-1/[#6](=O)-[#7]-c2ccccc-12                                                                                                                                                         | 30 | 56.7                | 0.45 | 0.67 |
| 32 | [#7]-[#6](-[#6]-[#6]-[#6]=O)-[#6](=O)-[#7]-1-[#6]-[#6]-[#7](-[#6]-[#6]-1)-c1nsc2ccccc12                                                                                                                         | 24 | 54.2                | 0.62 | 0.80 |
| 33 | [#8]-c1ccc2c(oc(\[#6]=[#6]\[#6]=[#6])cc2=O)c1\[#6]=[#7]/[#7]-[#6]=O                                                                                                                                             | 30 | 90.0                | 0.58 | 0.79 |
| 34 | [#8]-[#6]-c1nnc(-[#7]-c2ccccc2)o1                                                                                                                                                                               | 26 | 38.5                | 0.43 | 0.65 |
| 35 | [#6]\[#6]=[#6]/[#6]=[#6]\[#6]=[#7]/c1ccc(cc1)S(=O)(=O)[#7]-[#6]=[#7]                                                                                                                                            | 35 | 77.1                | 0.45 | 0.64 |
| 36 | Clc1ccc2-[#7]-[#6](=O)\[#6](=[#6]\c3ccc(cc3)-[#6](=O)-[#7]\[#7]=[#6]\c3ccccc3)-c2c1                                                                                                                             | 19 | 10.5                | 0.70 | 0.82 |
| 37 | [#6]-[#6]-1-[#6]-[#8]-c2c(-[#7]-3-[#6]-[#6]-[#7](-[#6])-[#6]-[#6]-3)c(F)cc3-[#6]-[#6](-[#6]=O)=[#6]-[#7]-1-c23                                                                                                  | 13 | 92.3                | 0.75 | 0.85 |
| 38 | [#6]C1([#6])[#6]-[#6]-2=[#6](-[#6](-[#6]3=[#6](-[#6]C([#6])([#6])[#6]\[#6]-3=[#7]/[#7])-[#7]-2)-c2ccccc2)\[#6](-[#6]1)=[#7]\[#7]                                                                                | 17 | 5.9                 | 0.49 | 0.80 |
| 39 | [#6]-[#6]-[#6]-[#6]-[#6]-[#6]-[#6]-[#6]-[#6]-[#6]-[#6]-[#6]-[#6]-c1nnc(-[#16])n1-[#7]=[#6]                                                                                                                      | 40 | 77.5                | 0.63 | 0.78 |
| 40 | [#6]-[#6]-[#7]-1-[#6]-[#7](-[#6]-[#6])-[#6](=O)-[#6](-[#6](-[#6])-[#6]-2-[#6](=O)-[#7](-[#6])-[#6]-[#7](-[#6])-[#6]-2=O)-[#6]-1=O                                                                               | 35 | 34.3                | 0.26 | 0.62 |
| 41 | [#6]-[#6]-[#6@H](-[#7]-[#6](=O)-[#6]-[#7]-[#6]=S)-[#6](=O)-[#7]-[#6]-[#6](=O)-[#7]-[#6@H](-[#6](-[#6])-[#6])-[#6](=O)-[#7]-1-[#6]-[#6]-[#6]-[#6@H]-1-[#6](=O)-[#7]-1-[#6]-[#6]-[#7](-[#6]-[#6]-1)-c1nsc2ccccc12 | 24 | 33.3 activity value | 0.73 | 0.84 |
| 42 | [#6]-[#6](-[#6])-[#6]-c1ccc(cc1)-[#6](-[#6])-[#6](-[#7])=O                                                                                                                                                      | 29 | 79.3                | 0.50 | 0.71 |
| 43 | [#6]-n1c2ccccc2c2cc(ccc12)-c1cc(\[#6]=[#6]\[#6]=[#6])nc(-[#7])n1                                                                                                                                                | 16 | 6.2                 | 0.71 | 0.82 |
| 44 | [#6]-[#7](-[#8])-[#6](=O)-[#6]-[#6](-[#8])-c1cccc1                                                                                                                                                              | 78 | 19.2                | 0.47 | 0.60 |
| 45 | [#6]-[#6](-[#6])-[#6](-[#7])-[#6]-[#6](-[#8])-[#6]-[#8]-c1ccc(-[#6]-[#6](-[#7])=O)cc1                                                                                                                           | 24 | 29.2                | 0.68 | 0.78 |
| 46 | [#7]-[#6](=S)-[#7]-[#7]=[#6]-[#6]-1=[#6]-[#6]=[#6]-[#6]=[#6]-1-[#8]-[#6]-[#6]-1=[#6]-[#6]-2=[#6]-[#6]=[#6]-[#6]=[#6]-2-[#8]-[#6]-1=O                                                                            | 16 | 43.8                | 0.78 | 0.85 |
| 47 | [#6]-[#6]-c1ccc2ccc(-[#8]-[#6])cc2c1                                                                                                                                                                            | 45 | 24.4                | 0.42 | 0.62 |
| 48 | [#8]-[#7+](=O)-c1cc(Cl)c2cc(oc2c1)-[#6](=O)-[#7]-1-[#6]-[#6]-[#16]-[#6]-1=O                                                                                                                                     | 14 | 92.9                | 0.65 | 0.80 |
| 49 | [#6]-n1cnc2cc(Cl)c(Cl)cc12                                                                                                                                                                                      | 32 | 84.4                | 0.34 | 0.55 |

33

34

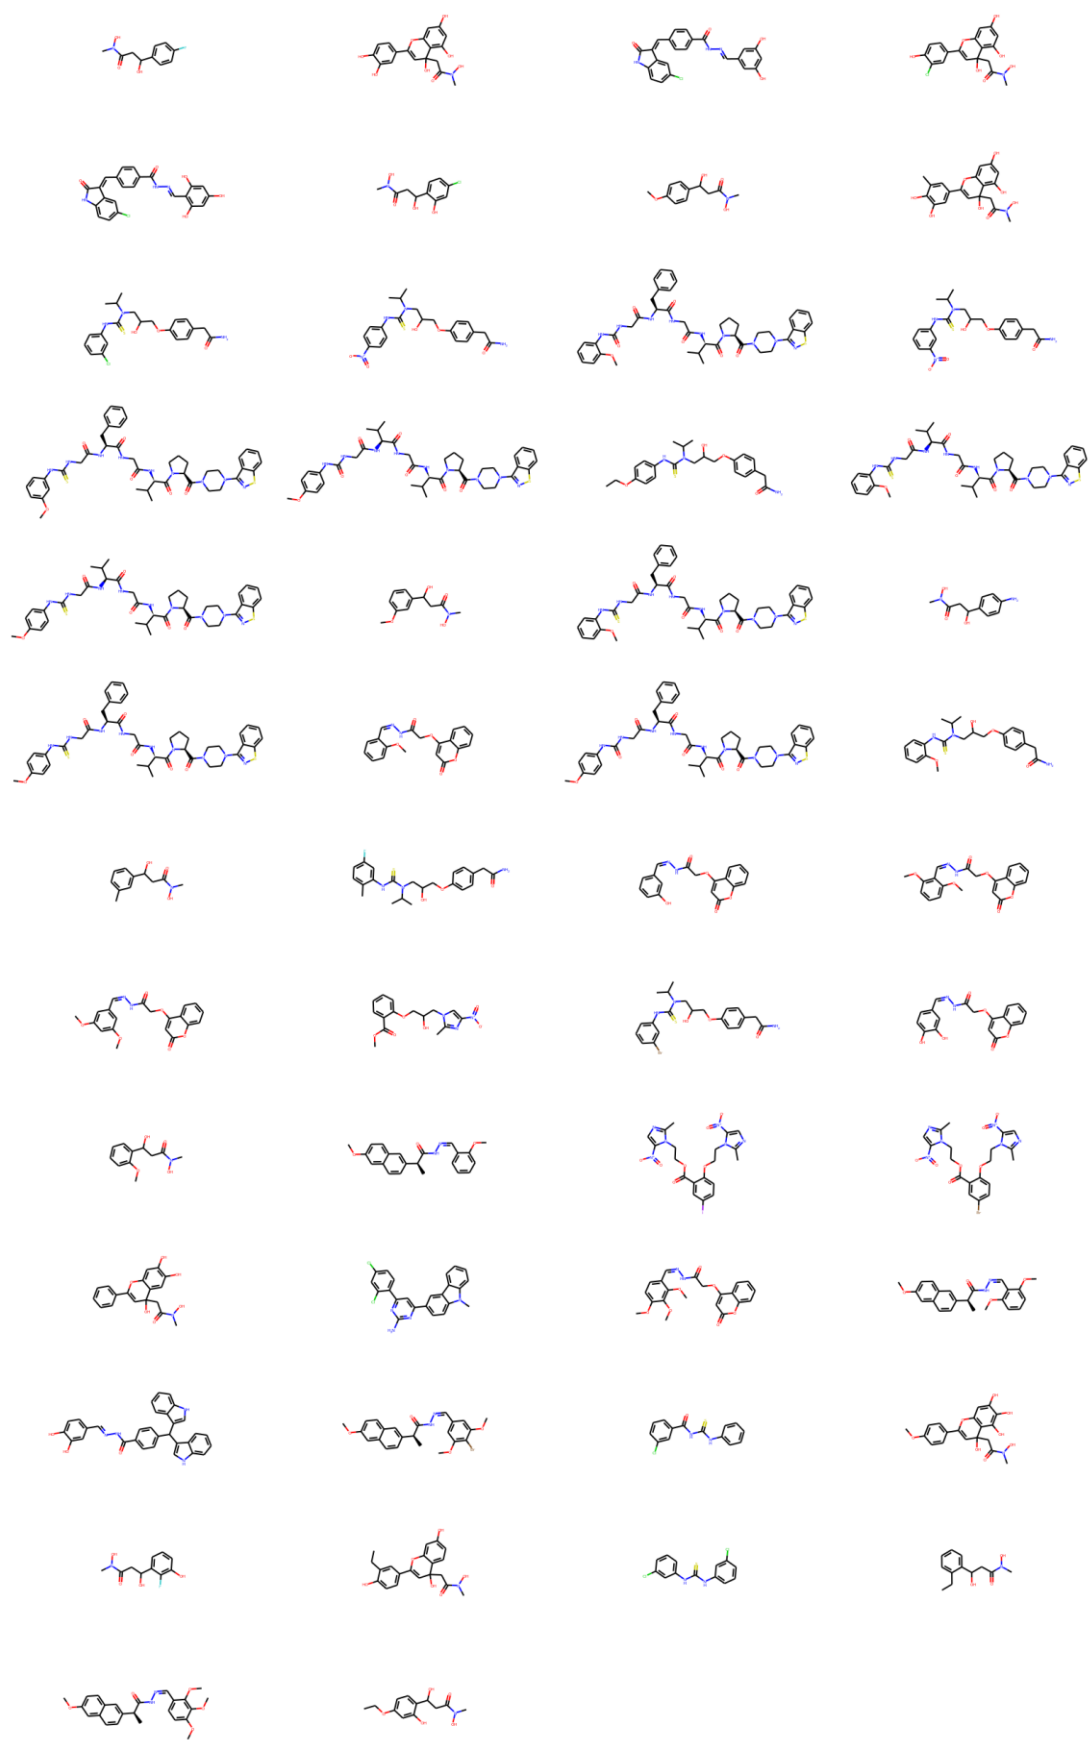

35

36

**Figure S6.** Example of dead-end molecules (part 1, cont.).

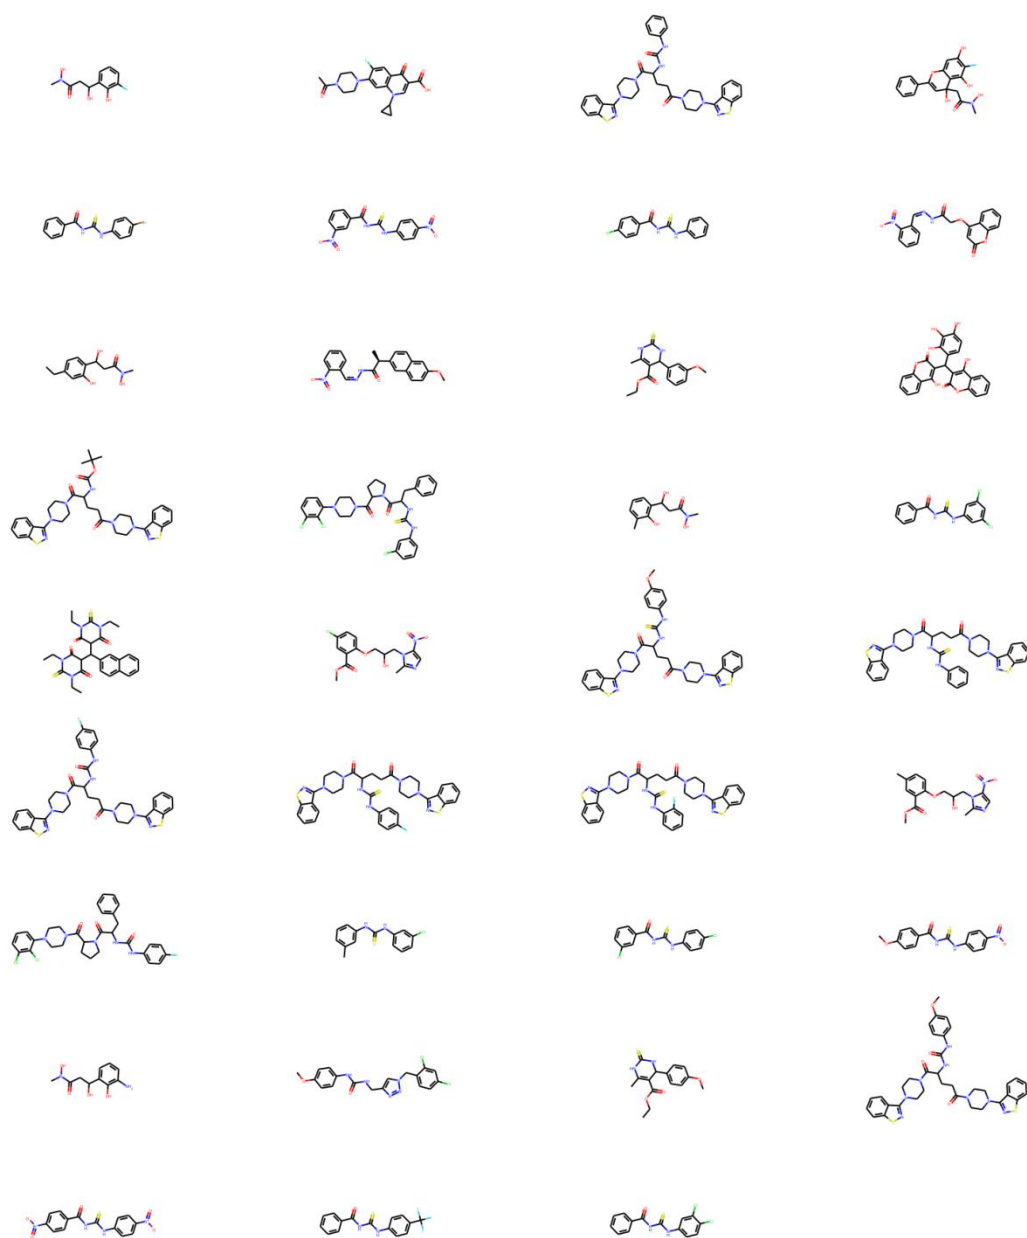

37

38

**Figure S6.** Example of dead-end molecules (part 2).

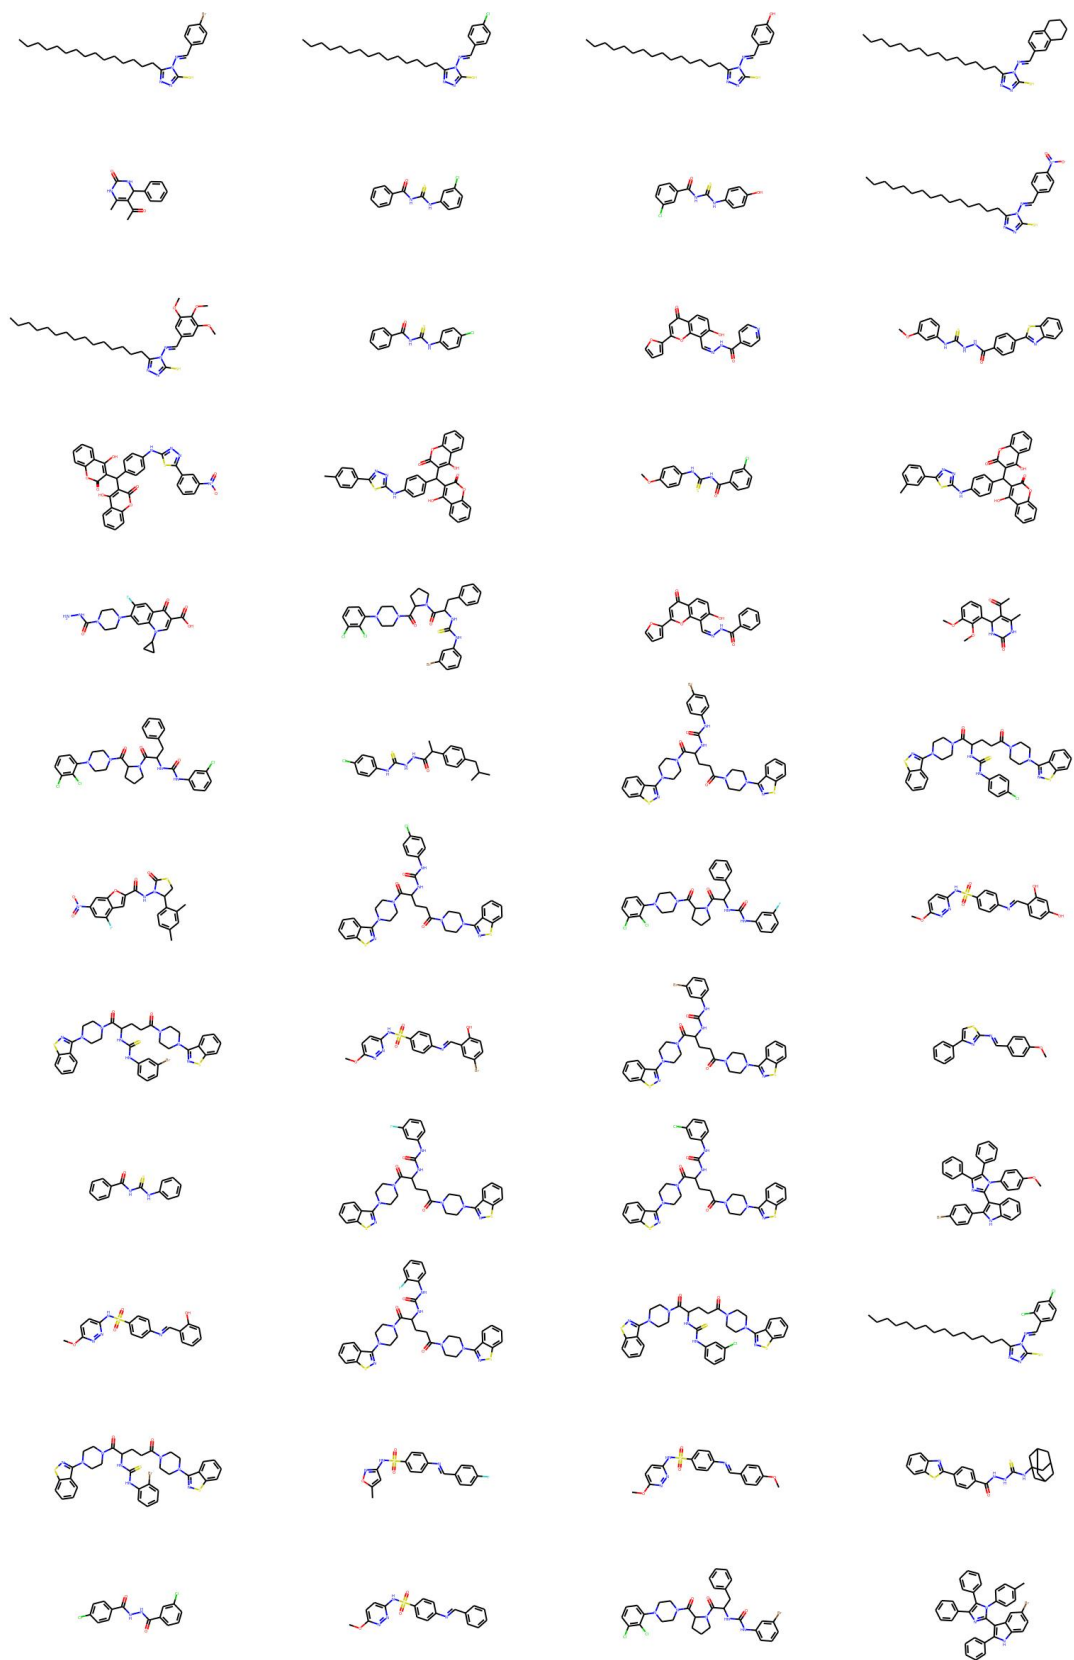

**Fig S7.** Example of safe bets (part 1, cont.).

39

40

41



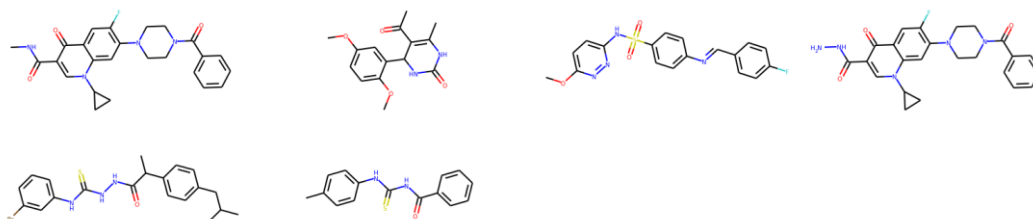

**Fig S7.** Example of safe bets (part 2, cont.).

**Table S2.** Urease inhibitors also present in the DrugBank.

| Name                        | SMILES                                                                                               |
|-----------------------------|------------------------------------------------------------------------------------------------------|
| <b>Deferiprone</b>          | <chem>O=C\1C(\O)=C(/N(/C=C/1)C)C</chem>                                                              |
| <b>Phenylalanine</b>        | <chem>[NH3+][C@H](CC1=CC=CC=C1)C([O-])=O</chem>                                                      |
| <b>Ropinirole</b>           | <chem>O=C2Nc1cccc(c1C2)CCN(CCC)CCC</chem>                                                            |
| <b>Pyroglutamic acid</b>    | <chem>O=C(O)[C@H]1NC(=O)CC1</chem>                                                                   |
| <b>Acetohydroxamic acid</b> | <chem>O=C(NO)C</chem>                                                                                |
| <b>Hydroxycarbamide</b>     | <chem>O=C(N)NO</chem>                                                                                |
| <b>Etacrynic acid</b>       | <chem>O=C(O)COc1c(Cl)c(Cl)c(cc1)C(=O)C(=C)CC</chem>                                                  |
| <b>Mannitol</b>             | <chem>O[C@H]([C@H](O)CO)[C@H](O)[C@H](O)CO</chem>                                                    |
| <b>Atenolol</b>             | <chem>O=C(N)Cc1ccc(cc1)OCC(O)CNC(C)C</chem>                                                          |
| <b>Ofloxacin</b>            | <chem>Fc4cc1c2N(/C=C\1C=O)C(=O)O)C(COc2c4N3CCN(C)CC3)C</chem>                                        |
| <b>Captopril</b>            | <chem>O=C(O)[C@H]1N(C(=O)[C@H](C)CS)CCC1</chem>                                                      |
| <b>Rutin</b>                | <chem>CC1C(C(C(C(O1)OCC2C(C(C(C(O2)OC3=C(OC4=CC(=CC(=C4C3=O)O)O)C5=CC(=C(C=C5)O)O)O)O)O)O)O)O</chem> |
| <b>Dicoumarol</b>           | <chem>O=C1Oc2ccccc2C(O)=C1CC3=C(O)c4ccccc4OC3=O</chem>                                               |
| <b>Isoniazid</b>            | <chem>C1=CN=CC=C1C(=O)NN</chem>                                                                      |
| <b>Secnidazole</b>          | <chem>[O-][N+](=O)c1cnc(n1CC(O)C)C</chem>                                                            |
| <b>Berberine</b>            | <chem>O1c2c(OC1)cc5c(c2)c4cc3ccc(OC)c(OC)c3c[n+]4CC5</chem>                                          |
| <b>Cianidanol</b>           | <chem>O[C@H]1CC2=C(O)C=C(O)C=C2O[C@H]1C1=CC=C(O)C(O)=C1</chem>                                       |

42

43

44

45

46

47
